# Supplementary material
Source: bioRxiv or medRxiv preprint supplement (https://www.medrxiv.org/content/medrxiv/early/2020/11/03/2020.10.28.20221200.1/DC1/embed/media-1.pdf)

Supplementary Fig-1

**A**

2.0µl Coffee oil    NIL    1.0µl Coffee oil    2.5µl Coffee oil    5.0µl Coffee oil    5.0µl Lemon grass oil

1    2    3    4    5    6

Absorbent paper    Non-absorbent paper

**B**

RGCB  
DISCOVERIES FOR A BETTER TOMORROW

COVID-Anosmia Checker

Instructions for carrying out COVID-Anosmia Checker Test

- Please fill Item No. ① & ③ completely.
- Cut the anosmia strip along the cut mark in Box 1. Smell for odor along the cut end. Tick YES if you smell an odor and NO if you don't smell an odor in Item No. ②. Please also identify the odor that you smell. Repeat the same for Box No. 2-6.

ID No.

① Name: \_\_\_\_\_  
Address: \_\_\_\_\_  
Phone No: \_\_\_\_\_  
Did you travel outside India within the past 14 days? YES  NO  Age   
If yes then please provide the following details.  
Date of Travel: \_\_\_\_\_ Gender M/F \_\_\_\_\_  
Flight No: \_\_\_\_\_  
Passport No: \_\_\_\_\_

② Identify the odor? If No the write NIL

|   | Yes                      | No                       | Identify the odor? If No the write NIL |
|---|--------------------------|--------------------------|----------------------------------------|
| ① | <input type="checkbox"/> | <input type="checkbox"/> | <input type="text"/>                   |
| ② | <input type="checkbox"/> | <input type="checkbox"/> | <input type="text"/>                   |
| ③ | <input type="checkbox"/> | <input type="checkbox"/> | <input type="text"/>                   |
| ④ | <input type="checkbox"/> | <input type="checkbox"/> | <input type="text"/>                   |
| ⑤ | <input type="checkbox"/> | <input type="checkbox"/> | <input type="text"/>                   |
| ⑥ | <input type="checkbox"/> | <input type="checkbox"/> | <input type="text"/>                   |

Please mark your answer with a

To be filled by appropriate testing authority

Date of Test: \_\_\_\_\_  
Name: \_\_\_\_\_  
Signature: \_\_\_\_\_

To be filled by RGCB

Anosmia Checker Result    Passed:   
Failed:

③ Do you have any of the following symptoms? Date of onset

|                             |                          |                      |
|-----------------------------|--------------------------|----------------------|
| a) Fever                    | <input type="checkbox"/> | <input type="text"/> |
| b) Tiredness                | <input type="checkbox"/> | <input type="text"/> |
| c) Dry Cough                | <input type="checkbox"/> | <input type="text"/> |
| d) Cough with expectoration | <input type="checkbox"/> | <input type="text"/> |
| e) Sore throat              | <input type="checkbox"/> | <input type="text"/> |
| f) Body aches and pains     | <input type="checkbox"/> | <input type="text"/> |
| g) Nasal congestion         | <input type="checkbox"/> | <input type="text"/> |
| h) Runny nose               | <input type="checkbox"/> | <input type="text"/> |
| i) Diarrhea                 | <input type="checkbox"/> | <input type="text"/> |
| j) Breathing difficulty     | <input type="checkbox"/> | <input type="text"/> |
| k) Loss of smell            | <input type="checkbox"/> | <input type="text"/> |
| l) Loss of taste            | <input type="checkbox"/> | <input type="text"/> |
| m) None of the above        | <input type="checkbox"/> | <input type="text"/> |

RT-PCR Result    Antibody Test Result

Positive:     Positive:

Negative:     Negative:

Date of testing     Date of testing

Name: \_\_\_\_\_  
Signature: \_\_\_\_\_

Supplementary Fig-2

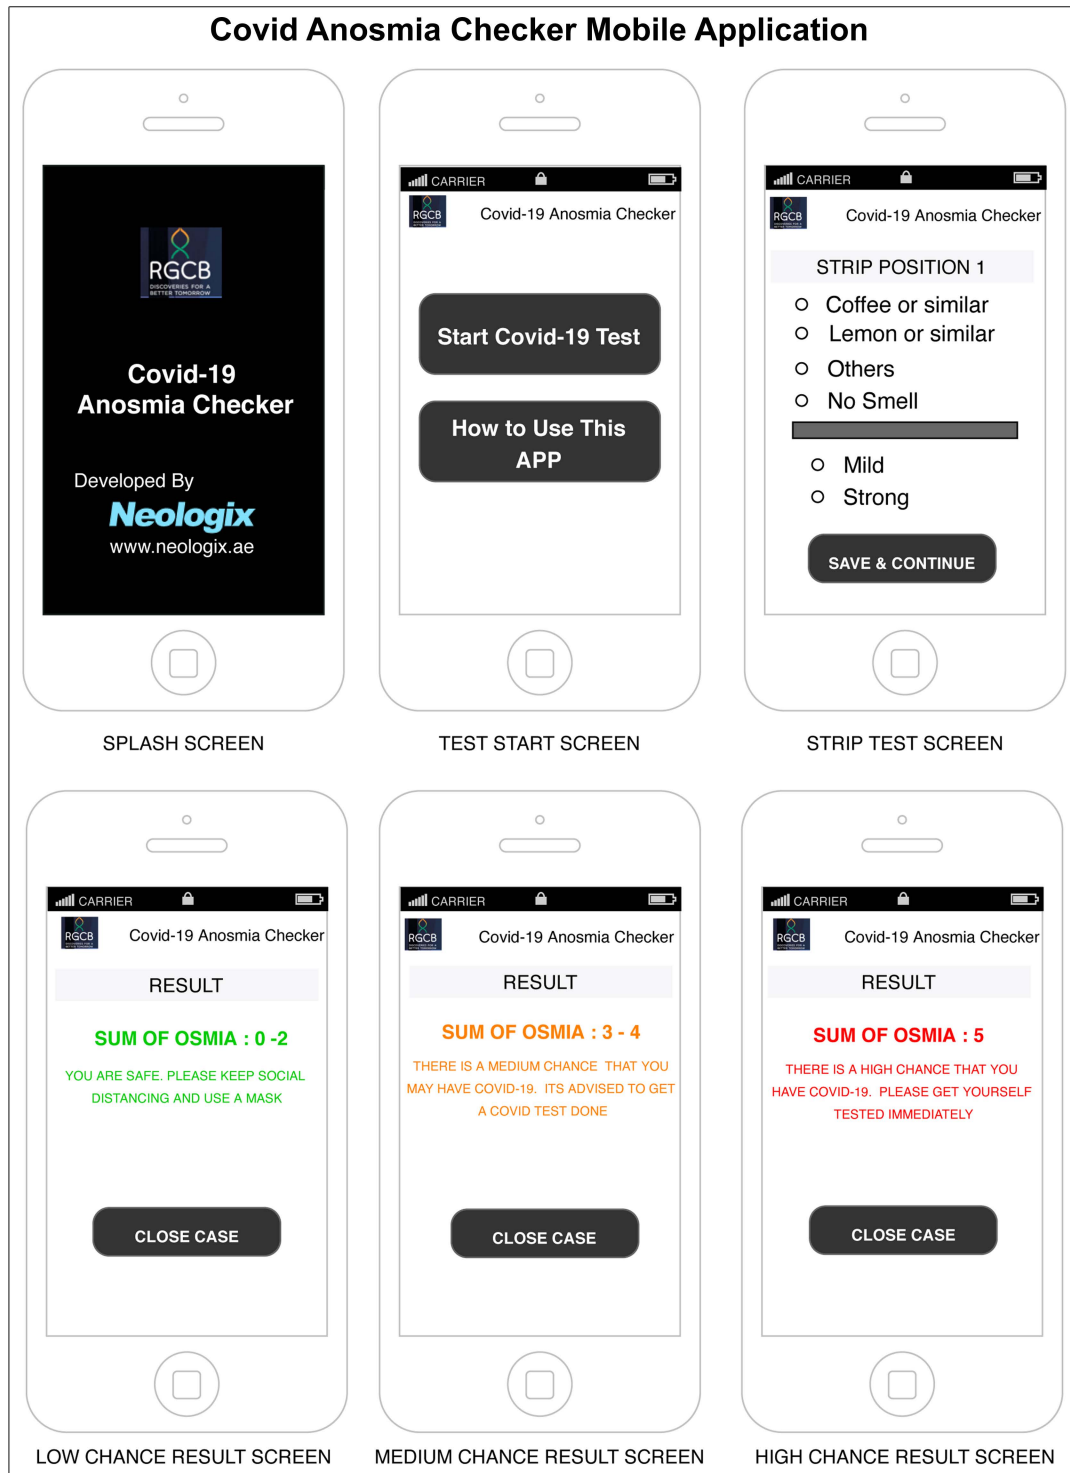

Supplementary Fig-3

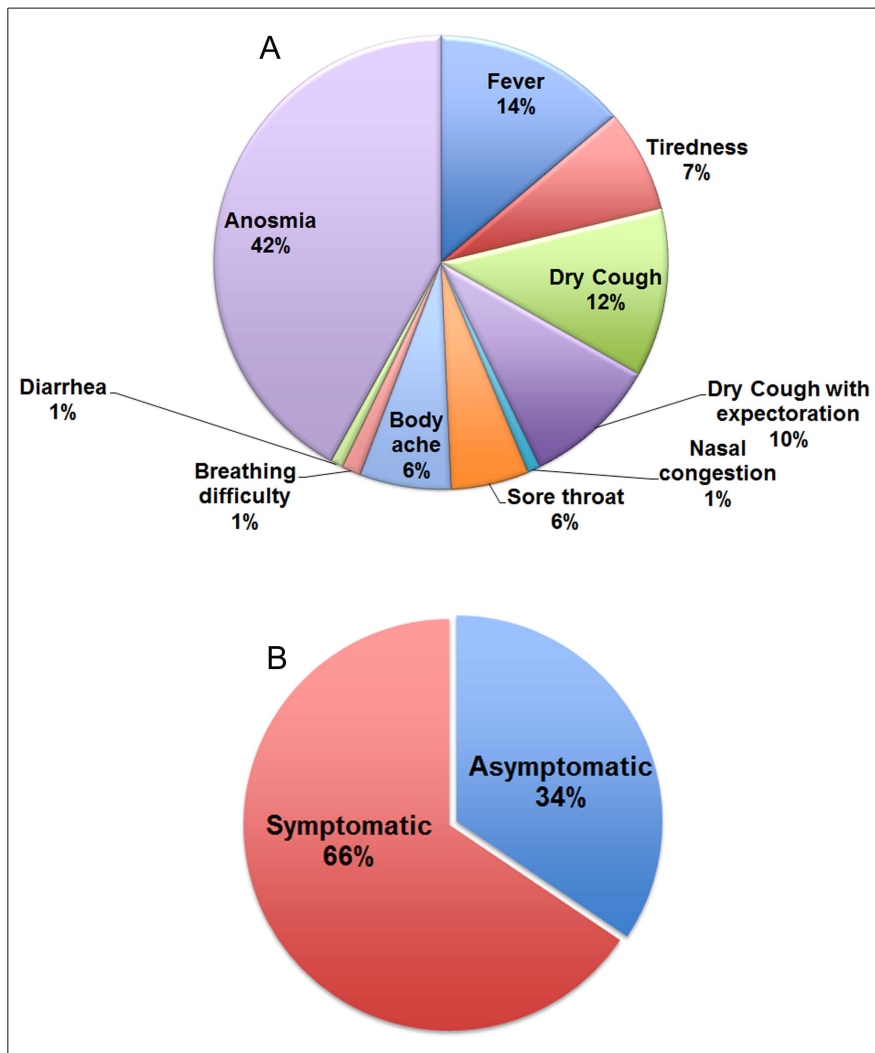

Supplement: Supplementary file [file media-1.pdf]
